# Supplementary material for: Molecular epidemiology of human enterovirus 71 at the origin of an epidemic of fatal hand, foot and mouth disease cases in Cambodia
Source: PubMed Central journal article supplement (PMC5113052; doi:10.1038/emi.2016.101), 2016-09-21
Supplement: emi2016101x3.pdf [file emi2016101x3.pdf]

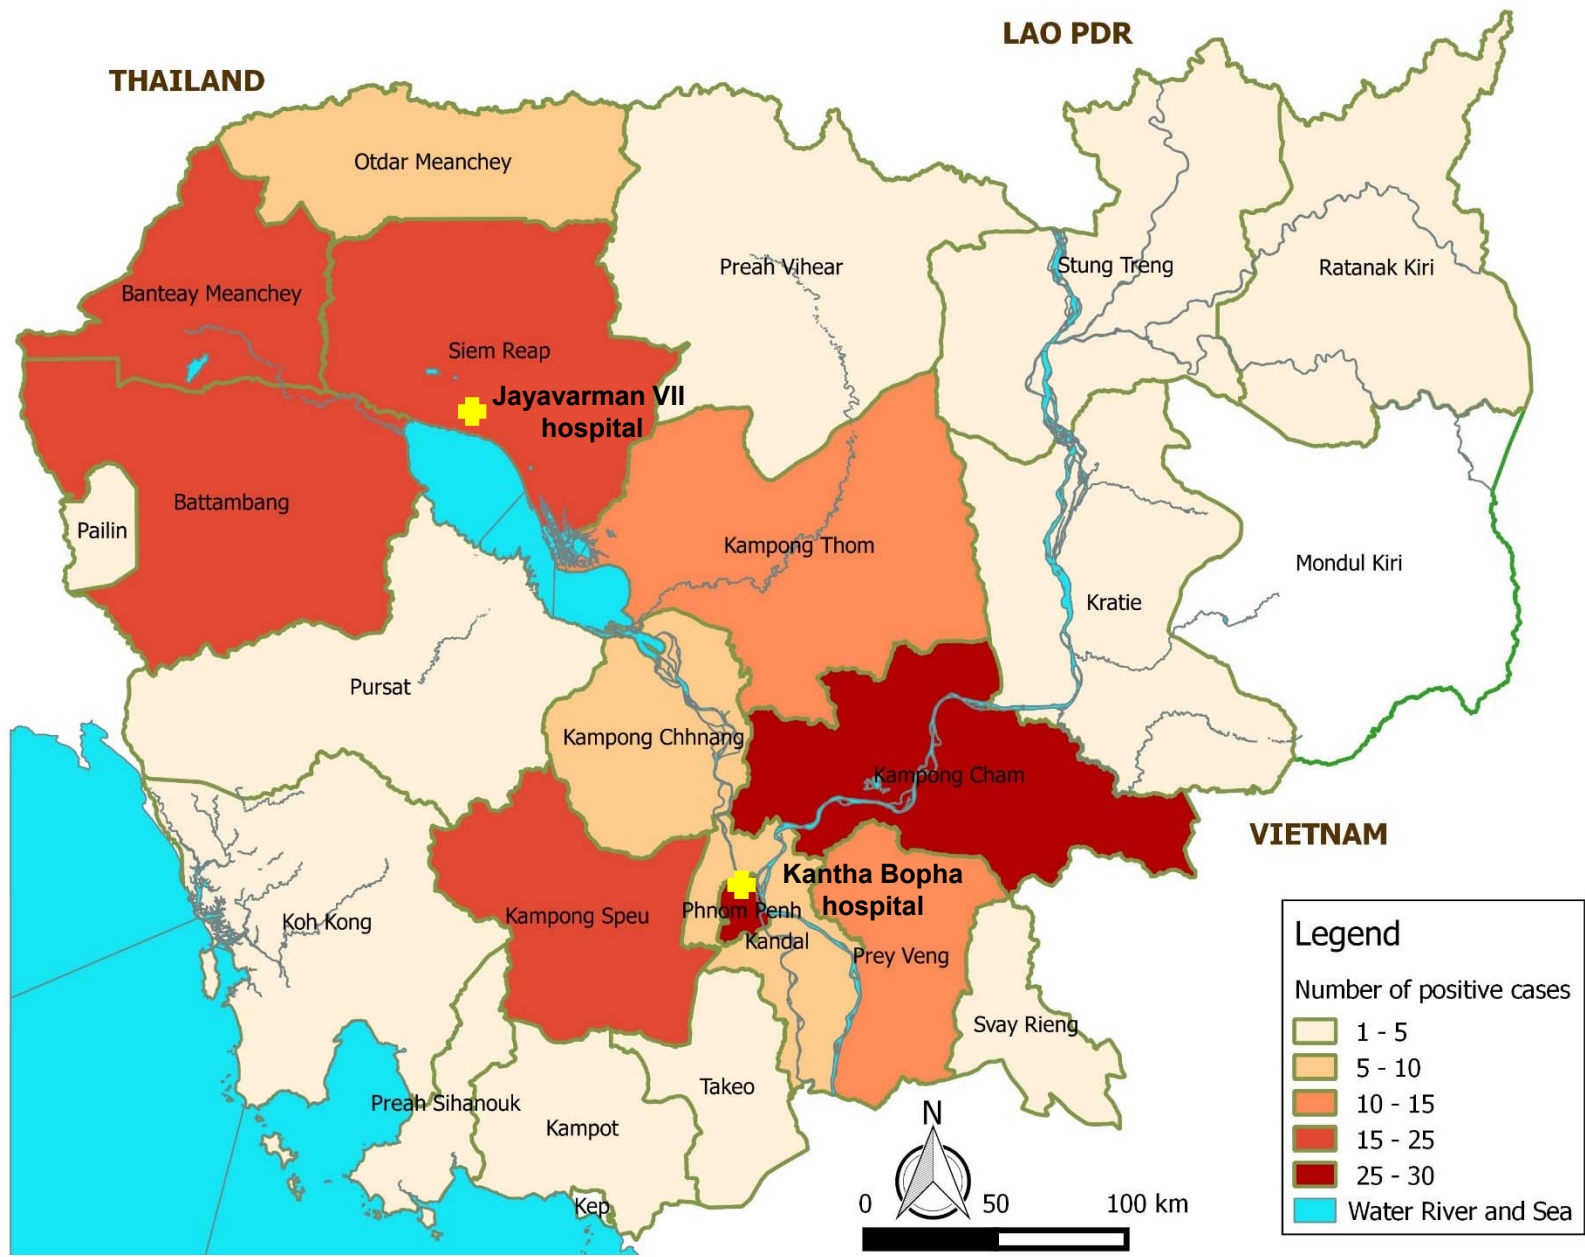

**Supplementary Figure S1** Map of Cambodia showing the number of EV-A71 positive cases by province. White color means that no cases occurred.
