# Supplementary material for: Molecular epidemiology of human enterovirus 71 at the origin of an epidemic of fatal hand, foot and mouth disease cases in Cambodia
Source: PubMed Central journal article supplement (PMC5113052; doi:10.1038/emi.2016.101), 2016-09-21
Supplement: emi2016101x4.pdf [file emi2016101x4.pdf]

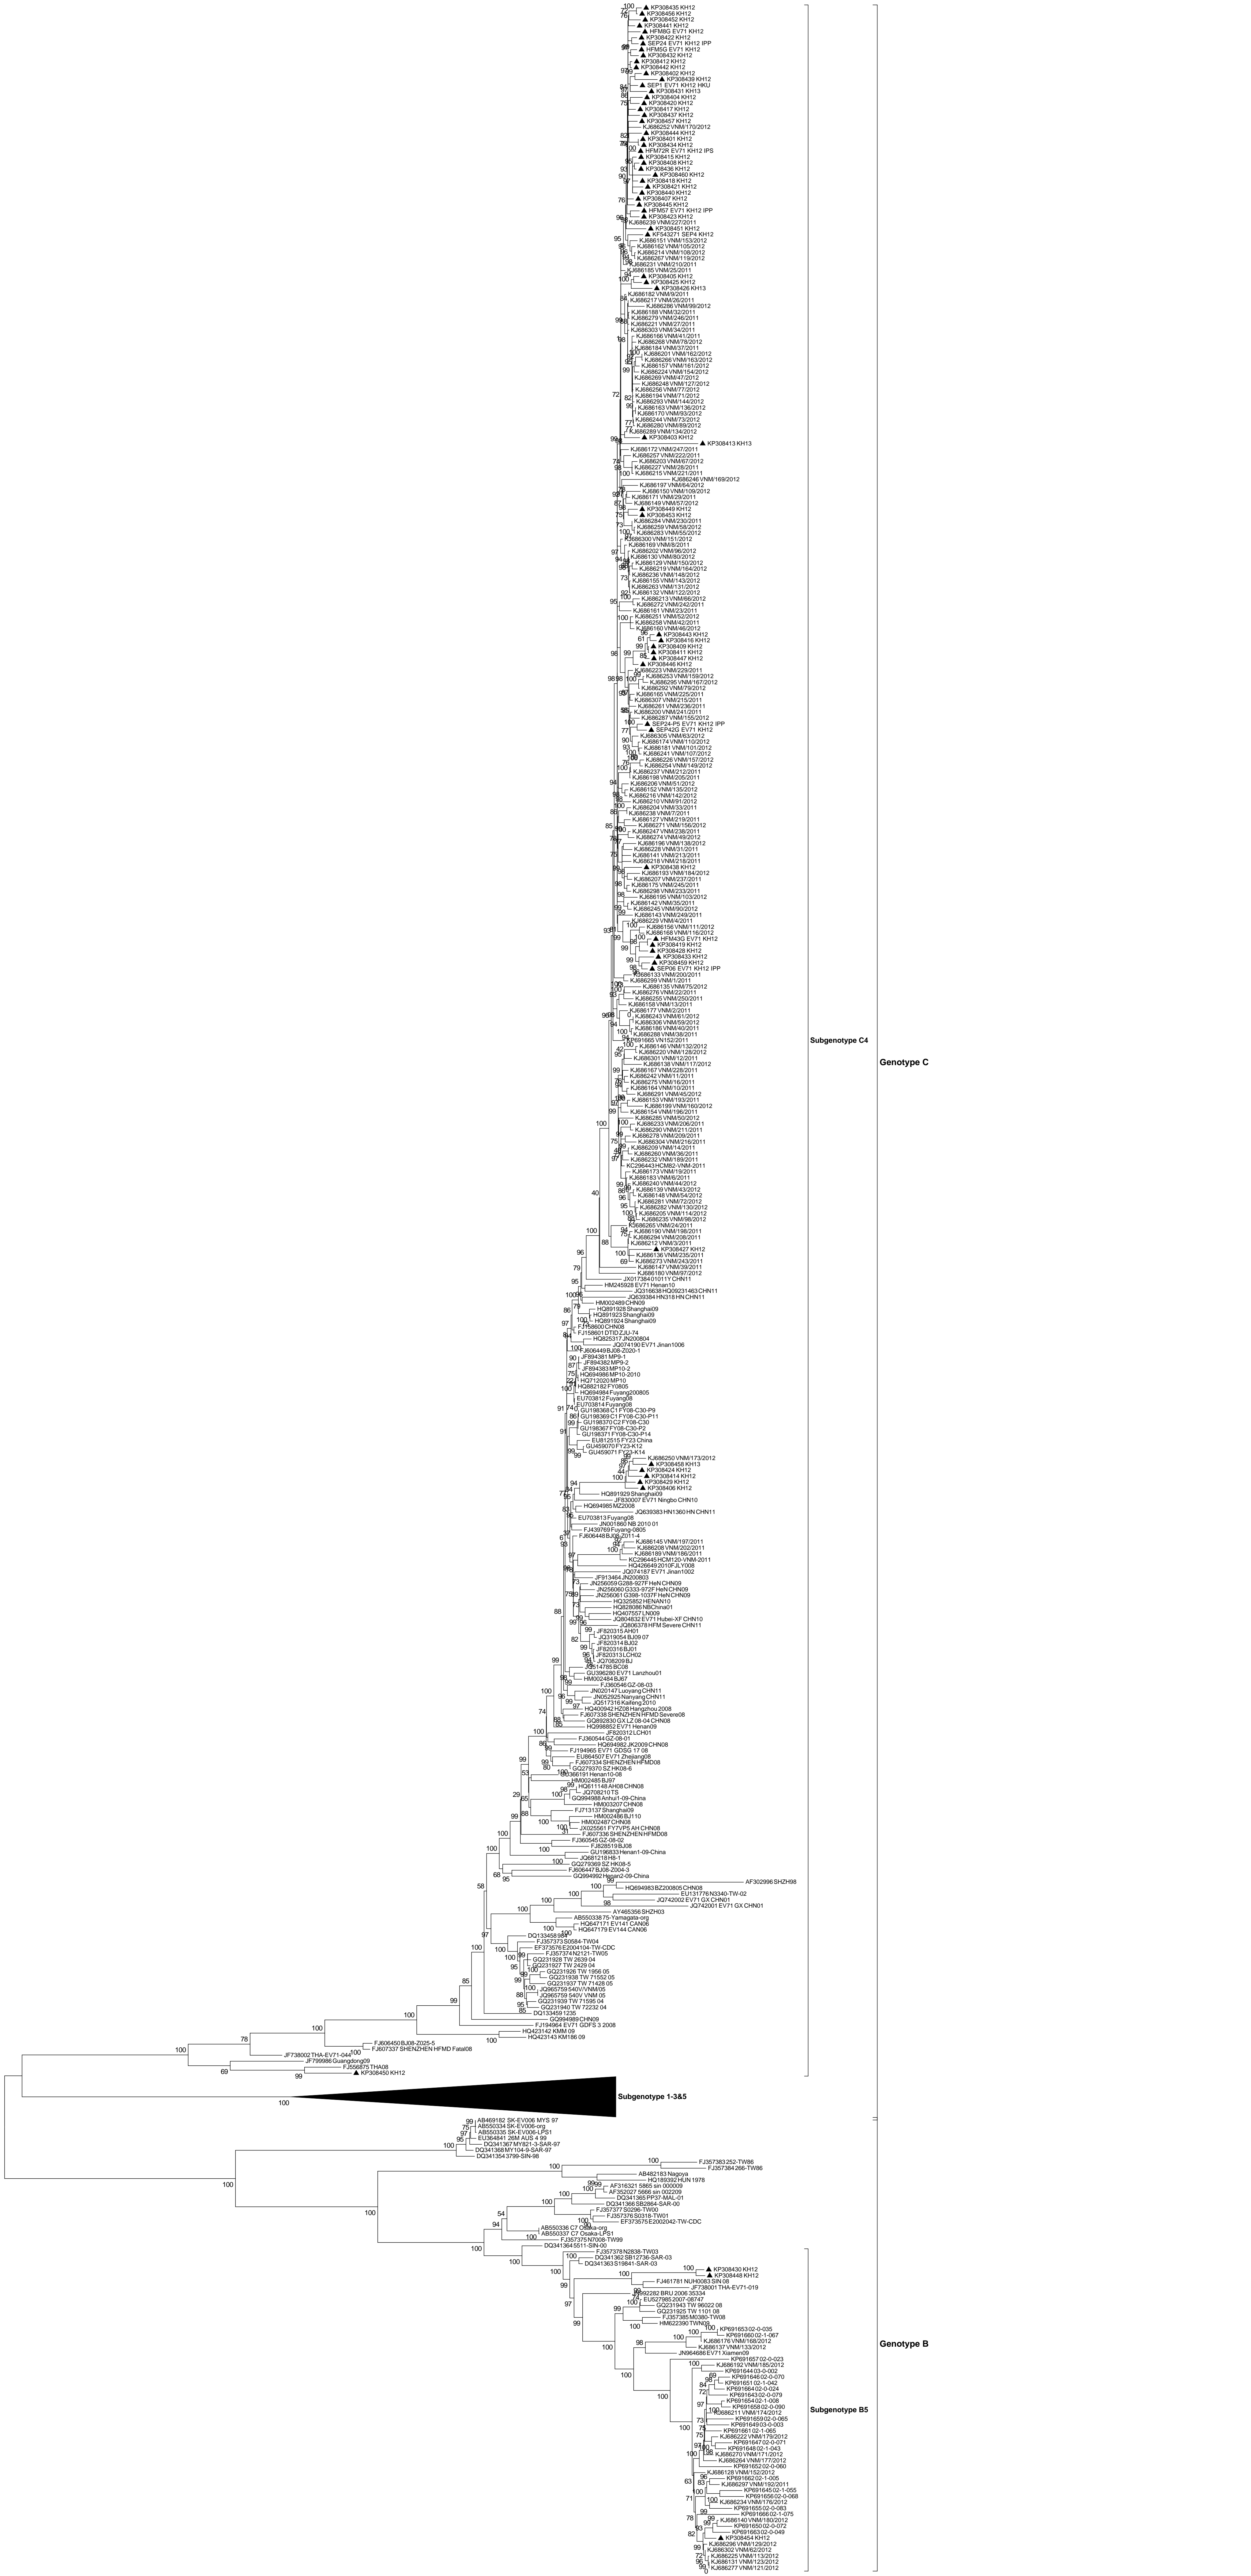

Supplementary Figure S2: Maximum likelihood (ML) phylogenetic tree of 467 EV-A71 full-genome sequences. The tree was built using the ML method based on the GTR+G4 model. The robustness of nodes was assessed with 100 bootstrap replicates. Bootstrap values lower than 70 are not shown. Cambodian sequences are marked with black triangles.
